# Supplementary material for: Specific Bile Microorganisms Caused by Intra-Abdominal Abscess on Pancreaticoduodenectomy Patients: A Retrospective Cohort Study
Source: Curr Oncol. 2021 Dec 27;29(1):111–21. doi: 10.3390/curroncol29010009 (PMC8774444; doi:10.3390/curroncol29010009)
Supplement: Supplementary file 1 [file curroncol-29-00009-s001.zip › curroncol-1471748-supplementary .pdf]

**Table S1.** Adjusted multivariate analysis to predict intra-abdominal abscess by including ineffective therapy as a variable.

| Clinical Variant                            | Odds Ratio | 95% CI      | <i>p</i> Value |
|---------------------------------------------|------------|-------------|----------------|
| Age                                         | 1.023      | 1.006–1.040 | 0.007          |
| Male                                        | 1.031      | 0.709–1.500 | 0.870          |
| ASA $\geq 3$                                | 0.785      | 0.515–1.199 | 0.264          |
| BMI                                         | 1.023      | 0.968–1.080 | 0.414          |
| T-BIL Maximum at any time                   | 1.001      | 0.959–1.044 | 0.963          |
| T-BIL, Maximum within 2 day before surgery  | 0.940      | 0.885–1.009 | 0.095          |
| Antibiotic use within 30 day before surgery | 1.011      | 0.674–1.517 | 0.955          |
| Preoperative biliary drainage               | 1.461      | 0.905–2.357 | 0.120          |
| CCI score $> 2$                             | 1.626      | 0.872–3.032 | 0.126          |
| Periampullary cancer                        | 1.145      | 0.714–1.835 | 0.573          |
| Pancreatitis                                | 1.115      | 0.607–2.048 | 0.724          |
| Pancreatic fistula                          | 0.806      | 0.555–1.170 | 0.257          |
| Ineffective therapy                         | 2.727      | 1.840–4.040 | $<0.001$       |

BMI, Body Mass Index; ASA physical status, American Society of Anesthesiologists physical status; T-BIL, Total-bilirubin; CCI score, Charlson comorbidity index score.
